# Supplementary material for: Improvement of a fermentation process for the production of two PfAMA1-DiCo-based malaria vaccine candidates in Pichia pastoris
Source: PubMed Central journal article supplement (PMC5607246; doi:10.1038/s41598-017-11819-4), 2017-09-20
Supplement: 41598_2017_11819_MOESM1_ESM.pdf [file 41598_2017_11819_MOESM1_ESM.pdf]

**Title: Improvement of a fermentation process for the production of two PfAMA1-DiCo-based malaria vaccine candidates in *Pichia pastoris***

**Authors:** Robin Kastilan<sup>1</sup>, Alexander Boes<sup>1</sup>, Holger Spiegel<sup>1,\*</sup>, Nadja Voepel<sup>1</sup>, Ivana Chudobová<sup>1</sup>, Stephan Hellwig<sup>1</sup>, Johannes Felix Buyel<sup>1,2</sup>, Andreas Reimann<sup>1</sup>, Rainer Fischer<sup>2,3</sup>

## Supplementary Text S1 - Mass spectrometry

Proteins were reduced, alkylated and digested in the polyacrylamide gel using trypsin (Promega, Mannheim, Germany) as previously described<sup>1</sup>. The resulting peptides were analyzed by nanoHPLC using an UltiMate 3000 HPLC system (LC PACKING, Dionex, Idstein, Germany) coupled to an amaZon ETD ion trap mass spectrometer (Bruker Daltonics, Bremen, Germany) with an ESI nanosprayer. The nanoHPLC system and the ion trap mass spectrometer were controlled using Bruker Compass HyStar v3.2 SR2 software. The liquid chromatography system comprised a reversed-phase pre-column (LC PACKINGS, Dionex) for sample desalting and a 15-cm PepMap 100 reversed-phase C18 column, 75  $\mu\text{m}$  inner diameter (LC PACKINGS, Dionex), for peptide fractionation. The peptides were separated using a 45-min linear gradient from 96% (v/v) solution A (2% (v/v) acetonitrile, 0.1% (v/v) formic acid in high-purity water) and 4% (v/v) solution B (98% (v/v) acetonitrile, 0.1% (v/v) formic acid in high-purity water) to 50% (v/v) solution A and 50% (v/v) solution B at a flow rate of 300  $\text{nL min}^{-1}$ . The electrospray was operated in positive ion mode with a spray voltage of  $-4000\text{ V}$  and 10 psi gas pressure. The end plate offset of the mass spectrometer was set to  $-500\text{ V}$  and Proteomics AutoMSMS Alternating Spectra CID-ETD Bruker trapControl v7.0 was used for data acquisition. Raw data files were evaluated using Compass DataAnalysis v4.0 SR5 software with embedded search engine Mascot Search v2.3.01 (Matrix Science Ltd, London, UK). The spectra were searched against the NCBI nr fungi database and the cRAP database (including VAMAX1 and VAMAX2 sequences) using the following parameters: enzyme = trypsin, up to one missed cleavage permitted, no fixed modifications, variable modifications allowed = carbamidomethyl (C), oxidation (M) and propionamide (C), mass tolerance for precursor ion  $\pm 0.3\text{ Da}$  and fragment ion  $\pm 0.3\text{ Da}$ .

## Supplementary Figure S1

VAMAX1

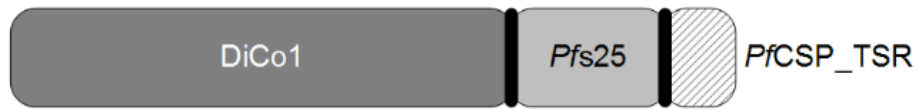

VAMAX2

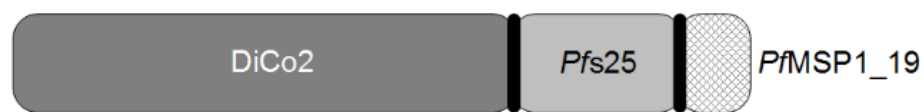

**Figure S1** Schematic representation of the VAMAX1 and VAMAX2 fusion antigens. DiCo1 and DiCo2 = diversity-covering variants of *PfAMA1* (dark gray); *Pfs25* = *Plasmodium falciparum* D7 sexual-stage surface antigen *Pfs25* (light gray); *PfCSP\_TSR* = thrombospondin-related region from *P. falciparum* 3D7 circumsporozoite protein *PfCSP* (hatched); *PfMSP1\_19* = C-terminal 19 kDa fragment of the merozoite surface protein 1 from *P. falciparum* strain FUP (cross-hatched).

## Supplementary Figure S2

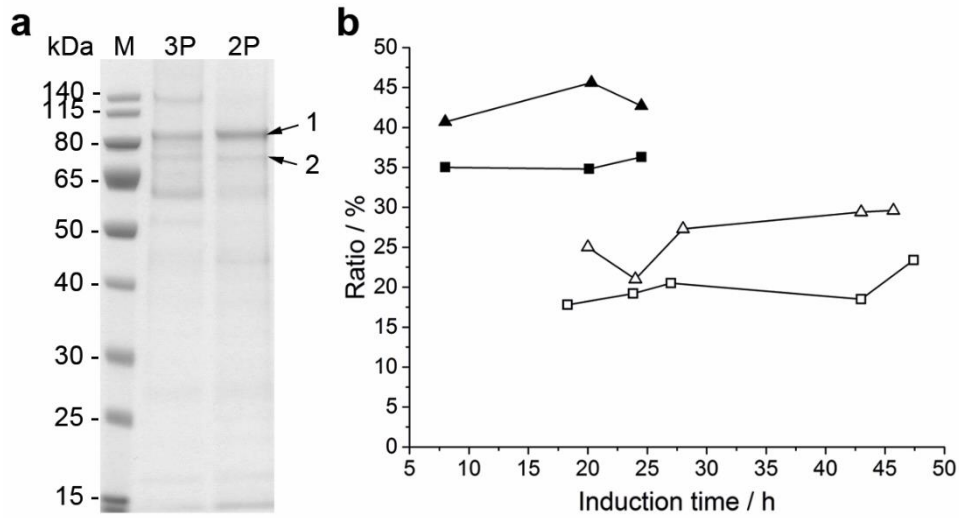

**Figure S2** Investigation of potential proteolytic activity in the fermentation broth during the course of induction. **(a)** Samples of the supernatant during the induction phase of both strategies (three-phase = 3P, two-phase = 2P) were analyzed by LDS-PAGE and Coomassie-staining followed by the assessment of the background-corrected intensity of protein band 1 (VAMAX1) and protein band 2 (degradation product of VAMAX1) using AIDA Image Analyzer software (Raytest). Representative samples shown here from the end of the fermentation runs. M: marker. **(b)** To detect potential proteolytic activity in the fermentation broth the intensity ratio of band 1 to band 2 was plotted during the induction phase. Filled symbols: three-phase strategy. Open symbols: two-phase strategy. Squares: VAMAX1 fermentations. Triangles: VAMAX2 fermentations.

## Supplementary Figure S3

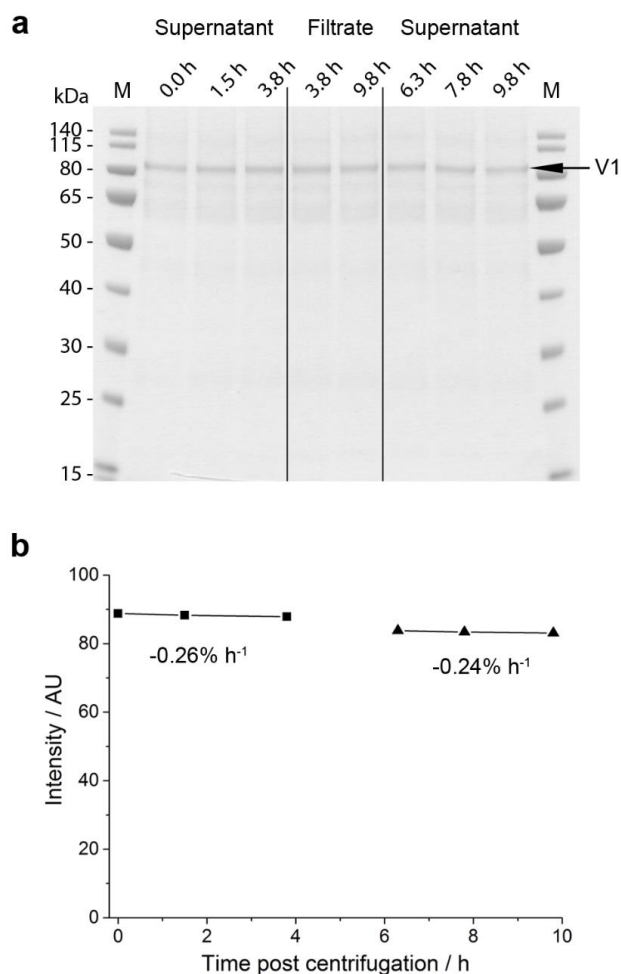

**Figure S3** Stability of VAMAX1 (V1) in the supernatant after solid-liquid separation by centrifugation. At the end of the two-phase process, the cells were semi-continuously separated from the fermentation broth by centrifugation with a CARR Powerfuge P6 at  $5,500 \times g$  and a feed rate of  $0.75 \text{ kg min}^{-1}$ . The cell density was considerably reduced to an  $\text{OD}_{600}$  of  $2.48 \pm 0.01$  ( $n = 3$ ) in the supernatant. **(a)** The stability testing of VAMAX1 was performed during two consecutive filtration experiments starting directly (0.0 h) and 6.3 h after centrifugation, respectively, at room temperature. Samples of the supernatant were taken at the indicated times post-centrifugation and were analyzed by LDS-PAGE and Coomassie-staining. **(b)** The Coomassie-stained bands of VAMAX1 were evaluated by densitometric analysis using AIDA Image Analyzer software. The background-corrected integral of each band was plotted over time post-centrifugation. During the first filtration experiment, the apparent decrease in band intensity (representing product loss) was  $-0.26\%$  per hour, calculated using a linear regression function ( $R^2 = 0.97$ ). For the second filtration experiment, the decrease in band intensity was  $-0.24\%$  per hour ( $R^2 = 0.97$ ).

### Supplementary Table S1 – Mass spectrometry data

| Candidate / Protein band | Accession                     | Protein                                                                                                                   | Score | Peptides | Sequence coverage |
|--------------------------|-------------------------------|---------------------------------------------------------------------------------------------------------------------------|-------|----------|-------------------|
| <b>VAMAX1</b>            |                               |                                                                                                                           |       |          |                   |
| <b>Band 1</b>            | VAMAX1_Dico1_pfs25FKO_CSP_TSR | VAMAX1                                                                                                                    | 103.1 | 4        | 5.9%              |
|                          | gi 328352741                  | Endochitinase [ <i>Komagataella phaffii</i> CBS 7435]                                                                     | 137.0 | 2        | 8.0%              |
| <b>Band 2</b>            | VAMAX1_Dico1_pfs25FKO_CSP_TSR | VAMAX1                                                                                                                    | 396.1 | 8        | 12.9%             |
| <b>VAMAX2</b>            |                               |                                                                                                                           |       |          |                   |
| <b>Band 1</b>            | VAMAX2_Dico2_pfs25FKO_MSP1_19 | VAMAX2                                                                                                                    | 313.2 | 8        | 12.4%             |
|                          | gi 328352741                  | Endochitinase [ <i>K. phaffii</i> CBS 7435]                                                                               | 273.0 | 3        | 10.0%             |
|                          | gi 254564921                  | Cell wall protein with similarity to glucanases [ <i>K. phaffii</i> GS115]                                                | 237.0 | 4        | 15.0%             |
|                          | gi 254570078                  | Protein of the SUN family (Sim1p, Uth1p, Nca3p, Sun4p) that may participate in DNA replication [ <i>K. phaffii</i> GS115] | 193.0 | 2        | 9.0%              |
| <b>Band 2</b>            | VAMAX2_Dico2_pfs25FKO_MSP1_19 | VAMAX2                                                                                                                    | 539.1 | 12       | 21.5%             |
|                          | gi 254564921                  | Cell wall protein with similarity to glucanases [ <i>K. phaffii</i> GS115]                                                | 196.0 | 3        | 11.0%             |
|                          | gi 254570078                  | Protein of the SUN family (Sim1p, Uth1p, Nca3p, Sun4p) that may participate in DNA replication [ <i>K. phaffii</i> GS115] | 171.0 | 2        | 9.0%              |

## Supplementary Data S1

Sequences of the putative host cell proteins identified by mass spectrometry (Supplementary Table S1) were used as BLAST queries against the UniProtKB database with the following parameters:

- Threshold e-value: 0.001
- Matrix: auto
- Filtering: none
- Gapped: yes
- Hits: 100

Alignment with an endochitinase from *Saccharomyces cerevisiae* (UniProtKB entry P29029) found by using gi|328352741 (endochitinase [*Komagataella phaffii* CBS 7435]) as a BLAST query:

| P29029                   |              | CHIT_YEAST - <b>Endochitinase</b> <i>Saccharomyces cerevisiae</i> (strain ATCC 204508 / S288c) (Baker's yeast) |                                                                   |
|--------------------------|--------------|----------------------------------------------------------------------------------------------------------------|-------------------------------------------------------------------|
| <b>E-value:</b> 6.8e-133 |              |                                                                                                                |                                                                   |
| <b>Score:</b> 1067       |              |                                                                                                                |                                                                   |
| <b>Ident.:</b> 48.0%     |              |                                                                                                                |                                                                   |
| <b>Positives:</b> 66.1%  |              |                                                                                                                |                                                                   |
| <b>Query Length:</b> 686 |              |                                                                                                                |                                                                   |
| <b>Match Length:</b> 562 |              |                                                                                                                |                                                                   |
|                          |              |                                                                                                                |                                                                   |
| F2QUR1                   | F2QUR1_KOMPC | 18                                                                                                             | AFDNSAKNNVALYWGQNSAGSQRERLSYYCQSDSVDIVLLSFLYIFPANPLGLDFSNACGD 77  |
| P29029                   | CHIT_YEAST   | 20                                                                                                             | AFD SA N+A+YWGQNSAG+QE L+ YC+S DI LLSFL FP LGL+F+NAC D 77         |
| F2QUR1                   | F2QUR1_KOMPC | 78                                                                                                             | QFPSGLLKCDTIAEDIQCQSLGKKVLLSLGGATGTYGFSSDSEAEFVAEVLWDTF-LGG 136   |
| P29029                   | CHIT_YEAST   | 78                                                                                                             | F GLL C IAEDI+TCQSLGKKVLLSLGGA+G+Y FS DS+AE FA+ LWDTF G 137       |
| F2QUR1                   | F2QUR1_KOMPC | 137                                                                                                            | TFSDDLHCTQIAEDIETCQSLGKKVLLSLGGASGSYLFSDDSQAETFAQTLWDTFEGGT 196   |
| P29029                   | CHIT_YEAST   | 138                                                                                                            | STDERPFGDSILDGIDYDAENNNPTGYTALSAKLREFYASDPSRTYYIAAAPQCPYPDAS 196  |
| F2QUR1                   | F2QUR1_KOMPC | 197                                                                                                            | ERPF +++DG D+D ENNN GY+AL+ KLR +A + ++ YY++AAPQCPYPDAS 256        |
| P29029                   | CHIT_YEAST   | 197                                                                                                            | GASERPFDASVVDGDFDFDIENNNEVGYSALATKLRFLFA-EGTKQYYLSAAPQCPYPDAS 255 |
| F2QUR1                   | F2QUR1_KOMPC | 257                                                                                                            | VGDVLANADVDFVFIQFYNNYCALASTSFNWTWLDYAQNTSPNPNVKLYVGLPGGPTGA 315   |
| P29029                   | CHIT_YEAST   | 256                                                                                                            | VGD+L NAD+DF FIQFYNNY++ S FNW TWL YAQ SPN N+KL++GLPG + A 308      |
| F2QUR1                   | F2QUR1_KOMPC | 316                                                                                                            | VGDLEENADIDFAFIQFYNNYCSV-SGQFNWDTWLTYAQTVSPNKNIKLFLGLPGSASAA 375  |
| P29029                   | CHIT_YEAST   | 309                                                                                                            | ASTSSSQAAATSQTTSTLATSISSTPGSSSTVSSSSSLSSSSSPSSSSSTTIWWTPTD 361    |
| F2QUR1                   | F2QUR1_KOMPC | 376                                                                                                            | TS+SQ A T T +T TS +ST +S++ +S+S ++ S +S+ S + + +P 435             |
| P29029                   | CHIT_YEAST   | 362                                                                                                            | ---TSASQTATT--TVATSKTSAASTSSASTSSASTSQKKTQSTTTSQSKSVTLSP-- 415    |
| F2QUR1                   | F2QUR1_KOMPC | 436                                                                                                            | PQSSSSSVAAVSSETSSVLTSSVSTTQNSHGEVDSEGTLLTGTSTIWWTPSEAQSYETSS 494  |
| P29029                   | CHIT_YEAST   | 416                                                                                                            | +++SS++ ++T+ LTSS + T+S G +E T + T T +Q +S 474                    |
| F2QUR1                   | F2QUR1_KOMPC | 495                                                                                                            | --TASSAIKTSITQTTKTLTSS-TRTKSSLGTTTTSTLNSVAITSMKTTLSSQ---ITS 504   |
| P29029                   | CHIT_YEAST   | 475                                                                                                            | LSSVSSIPTGNKDVSSILVITDVTDSL-TKESSDSALTISTSLSSSPSLADSSRDGET 484    |
| F2QUR1                   | F2QUR1_KOMPC |                                                                                                                | + V+ T VSS + T +T +L+ +TK SS +L +T+ + SP+ +S G T                  |
| P29029                   | CHIT_YEAST   |                                                                                                                | AALVTPQTITTSIVSSAPIQTAITSTLSPATKSSSVVSLQTATTSTLSPTTSTTS-SGST      |
| F2QUR1                   | F2QUR1_KOMPC |                                                                                                                | STVVQVISST                                                        |
| P29029                   | CHIT_YEAST   |                                                                                                                | S+ + ST                                                           |
| F2QUR1                   | F2QUR1_KOMPC |                                                                                                                | SSGSTSSDST                                                        |
| P29029                   | CHIT_YEAST   |                                                                                                                |                                                                   |

Alignment with a putative family 17 glucosidase SCW10 from *S. cerevisiae* (UniProtKB entry Q04951) found by using gi|254564921 (cell wall protein with similarity to glucanases [*K. phaffii* GS115]) as a BLAST query:

| Q04951                   | SCW10_YEAST - Probable family 17 glucosidase SCW10 | Saccharomyces cerevisiae (strain ATCC 204508 / S288c) (Baker's yeast) |                                                                |     |
|--------------------------|----------------------------------------------------|-----------------------------------------------------------------------|----------------------------------------------------------------|-----|
| <b>E-value:</b> 3.5e-124 |                                                    |                                                                       |                                                                |     |
| <b>Score:</b> 961        |                                                    |                                                                       |                                                                |     |
| <b>Ident.:</b> 55.5%     |                                                    |                                                                       |                                                                |     |
| <b>Positives :</b> 67.8% |                                                    |                                                                       |                                                                |     |
| <b>Query Length:</b> 348 |                                                    |                                                                       |                                                                |     |
| <b>Match Length:</b> 389 |                                                    |                                                                       |                                                                |     |
|                          |                                                    |                                                                       |                                                                |     |
| C4QVL7                   | C4QVL7_PICPG                                       | 26                                                                    | HQHDKRGVVVVIK----TIVVDG-----STVEATAA                           | 52  |
|                          |                                                    |                                                                       | H+H+KR VV T T+VV G ST+E I +                                    |     |
| Q04951                   | SCW10_YEAST                                        | 24                                                                    | HKHEKRDVVTATVHAQVTVVVSGNSGETIIVPNENAVVAITTSSTAVASQATTSTLEPTTS  | 83  |
| C4QVL7                   | C4QVL7_PICPG                                       | 53                                                                    | AQV---QEHAETFAESTPSAVV--SSSSAPSSASSASAPASSGFSFA---GKGVITYSP    | 103 |
|                          |                                                    |                                                                       | A V Q+ T S ++ V S+SS+PSS+SS S+ ASS + S+ G KG+TYSP              |     |
| Q04951                   | SCW10_YEAST                                        | 84                                                                    | ANVVTSQQQTSTLQSSAASTVGSSTSSPSSSSSTSSSASSSSASSISASGAKGITYSP     | 143 |
| C4QVL7                   | C4QVL7_PICPG                                       | 104                                                                   | YQAGGGCKTAEVASDLSQLTGYEIIIRLYGVDCNQVENVFKAKAPGQKFLFLGIFVDAIE   | 163 |
|                          |                                                    |                                                                       | Y G CK+ +VASDL QLTG++ IRLYGVDC+QVENV +AK QKFLFLGI++VD I+       |     |
| Q04951                   | SCW10_YEAST                                        | 144                                                                   | YNDDGSCKSTAQVADLEQLTGFNIRLYGVDCSQVENVLQAKTSSQKFLFLGIYVVKRIQ    | 203 |
| C4QVL7                   | C4QVL7_PICPG                                       | 164                                                                   | SGVSAIASAVKSYGSWDDVHTVSVGNELVNGEATVVSQIGQYVSTAKSALRSAGFTGPVL   | 223 |
|                          |                                                    |                                                                       | V I SAV+SYGSWDD+ TVSVGNELVN G AT +Q+G+YVSTAKSAL SAG+IG V+      |     |
| Q04951                   | SCW10_YEAST                                        | 204                                                                   | DAVDTIKSAVESYGSWDDITTVSVGNELVNGGSATTTQVGEYVSTAKSALTSAGYTGSSV   | 263 |
| C4QVL7                   | C4QVL7_PICPG                                       | 224                                                                   | SVDTFIAVINNPGLCDFADEYVAVNAHAFFDGGIAASGAGDWAAEQIQRVSSACGG-KDV   | 282 |
|                          |                                                    |                                                                       | SVDTFIAVINNP LC+++D Y+AVNAHA+FD AA AG W EQI+RV +ACGG KDV       |     |
| Q04951                   | SCW10_YEAST                                        | 264                                                                   | SVDTFIAVINNPDLCLNYSD-YMAVNAHAYFDENTAAQDAGPWVLEQIERVYTACGGKKDV  | 322 |
| C4QVL7                   | C4QVL7_PICPG                                       | 283                                                                   | LIVESGWPSPKGDITNGAAVPSKSNQQAQVQSLGQKIGSSCIAFNAFNDYWKADGPFNAEKY | 342 |
|                          |                                                    |                                                                       | +I E+GWPSKGDIT G AVPSK+NQ+AA+ S+ GSS F AFND WK DG + EKY        |     |
| Q04951                   | SCW10_YEAST                                        | 323                                                                   | VITETGWPSKGDITYGEAVPSKANQEAAISSIKSSCGSSAYLFTAFNDLWKDDGQYGVVEKY | 382 |
| C4QVL7                   | C4QVL7_PICPG                                       | 343                                                                   | WGILDS                                                         | 348 |
|                          |                                                    |                                                                       | WGIL S                                                         |     |
| Q04951                   | SCW10_YEAST                                        | 383                                                                   | WGILSS                                                         | 388 |



Alignment with a probable secreted  $\beta$ -glucosidase SUN4 from *S. cerevisiae* (UniProtKB entry P53616) found by using gi|254570078 (Protein of the SUN family [*K. phaffii* GS115]) as a BLAST query:

| P53616                   |              | SUN4_YEAST - Probable secreted beta-glucosidase SUN4 |                                                                                                                            | Saccharomyces cerevisiae (strain ATCC 204508 / S288c) (Baker's yeast) |  |
|--------------------------|--------------|------------------------------------------------------|----------------------------------------------------------------------------------------------------------------------------|-----------------------------------------------------------------------|--|
| <b>E-value:</b> 3.3e-163 |              |                                                      |                                                                                                                            |                                                                       |  |
| <b>Score:</b> 1231       |              |                                                      |                                                                                                                            |                                                                       |  |
| <b>Ident.:</b> 56.4%     |              |                                                      |                                                                                                                            |                                                                       |  |
| <b>Positives :</b> 69.9% |              |                                                      |                                                                                                                            |                                                                       |  |
| <b>Query Length:</b> 431 |              |                                                      |                                                                                                                            |                                                                       |  |
| <b>Match Length:</b> 420 |              |                                                      |                                                                                                                            |                                                                       |  |
|                          |              |                                                      |                                                                                                                            |                                                                       |  |
| C4R2Z5                   | C4R2Z5_PICPG | 1                                                    | MKISALTACAVTLAGLA-IAAPAPKPED----CITTVQKRHQKRAVAYDYVYVTVTING                                                                | 55                                                                    |  |
| P53616                   | SUN4_YEAST   | 1                                                    | MK+SA T A +L G + I + P D CITT HQHKRAVA YVY TVT++<br>MKLSATTLTAASLIGYSTIIVSALPYAADIDTGCTTTAGSHQHKRAVAVTVVYETVTVDK           | 60                                                                    |  |
| C4R2Z5                   | C4R2Z5_PICPG | 56                                                   | QGETISPTVVAELETVSTPAT--SSSAVATSSAPATTSSIPETISAQVITSSVAESTSAQ                                                               | 113                                                                   |  |
| P53616                   | SUN4_YEAST   | 61                                                   | G+I++PT TV++ T S S+V SS+ +SS E+I TTSS A++T<br>NGQTVIPTSTEASSTVASTTILISESSVTKSSSKVASSS--ESTEQTATTSSSAQTTLIS                 | 118                                                                   |  |
| C4R2Z5                   | C4R2Z5_PICPG | 114                                                  | FTSSTEAEASSSVEQITQSSSSSSPSSSSSSSSSSSSSSSGSSSSGGIDGDLWSYSGPKNKFO                                                            | 173                                                                   |  |
| P53616                   | SUN4_YEAST   | 119                                                  | +ST E+S + S+S S+S+ S++ S++G I GDL+ +SGP KF+<br>SETSTSESSVPI-----STSGSASTSSAASSATGSIYGDLDLDFSGPYEKFE                        | 164                                                                   |  |
| C4R2Z5                   | C4R2Z5_PICPG | 174                                                  | DGTIKCSEFPNGVVALDHLGFGGWSGLYHPSDTSTGGICEPDTYCSYACQSGMSKTQW                                                                 | 233                                                                   |  |
| P53616                   | SUN4_YEAST   | 165                                                  | DGTI C +FPNG GV+ + L GGWSG+ + +DSTGG C+ +YCSYACQ GMSKTQW<br>DGTIPCGQFPNGQGVIPISWLDEGGWSGVEN-TDTSTGGCKEYCSYACQPGMSKTQW      | 223                                                                   |  |
| C4R2Z5                   | C4R2Z5_PICPG | 234                                                  | PSEQPDNGVSVGGLYCDSGGLYRSKDDIDYLCEWGDVAVVSEIGKTAACRTDYPGT                                                                   | 293                                                                   |  |
| P53616                   | SUN4_YEAST   | 224                                                  | PS+QP +G S+GGL C DGYLYRS DTDYLCEWG+D AYVNSE+ AICRTDYPGT<br>PSDQPSDGRSIGGLLC-KDGYLYRSNTDIDYLCEWGVDAAYVSELSNDVAICRTDYPGT     | 282                                                                   |  |
| C4R2Z5                   | C4R2Z5_PICPG | 294                                                  | ENMVIPTVSPGDELPLTIVDQSSYYTWRGMKTSAQYYVNDAGVDWITGCTWGDYGTIDYG                                                               | 353                                                                   |  |
| P53616                   | SUN4_YEAST   | 283                                                  | ENMVIPT V G LPLT VDQ +YYTW+G+KTSAQYYVN+AG+ C WG + G<br>ENMVIPTVYVQAGDSLPLTIVDQDITYYTWQGLKTSAQYYVNNAGISVEDACVWGSSSSGVG      | 342                                                                   |  |
| C4R2Z5                   | C4R2Z5_PICPG | 354                                                  | NWAPLNFAGYDNGISYLSLIPNPNKDSLNYNVKIVAYDSSVVIAGECKYENGSYNMG                                                                  | 413                                                                   |  |
| P53616                   | SUN4_YEAST   | 343                                                  | NWAPLNFAGAG +G++YLSLIPNPN ++LN+NVKIVA DDSS V GEC YENG++G G<br>NWAPLNFAGSSDGVAYLSLIPNPNNGALNPNVNVKIVAAADSSIVNGECIYENGFSFG-G | 401                                                                   |  |
| C4R2Z5                   | C4R2Z5_PICPG | 414                                                  | SDGCTVAVNSGKAKFVLY                                                                                                         | 431                                                                   |  |
| P53616                   | SUN4_YEAST   | 402                                                  | SDGCTV+V +GKAKFVLY<br>SDGCTVSVIAGKAKFVLY                                                                                   | 419                                                                   |  |

### Supplementary Reference:

1. Shevchenko, A., Tomas, H., Havlis, J., Olsen, J.V. & Mann, M. In-gel digestion for mass spectrometric characterization of proteins and proteomes. *Nat. Protoc.* **1**, 2856-60, doi:10.1038/nprot.2006.468 (2006).
